# Supplementary material for: Linear free energy relationships in halogen bonds
Source: Royal Society of Chemistry journal article supplement (doi:10.1039/c2ce26786a), 2012-12-21
Supplement: c2ce26786a.pdf [file c2ce26786a.pdf]

## Supplementary Information Material (ESI)

CrystEngComm

Themed issue on Halogen bond: From self-assembly to materials and biomolecules

---

### **Linear Free Energy Relationships in Halogen Bonds**

**Ibon Alkorta,\* Goar Sánchez-Sanz and José Elguero**

**Table S1** I...X and Br...X distance in Å in the complexes between the *p*- and *m*-substituted halobenzenes and NH<sub>3</sub> (X = N), NCH (X = N) and CNH (X = C)

| Substituent                      | Hal = I                            | Hal = Br                           |                        |                        |                                    |
|----------------------------------|------------------------------------|------------------------------------|------------------------|------------------------|------------------------------------|
|                                  | NH <sub>3</sub><br>( <i>para</i> ) | NH <sub>3</sub><br>( <i>para</i> ) | NCH<br>( <i>para</i> ) | CNH<br>( <i>para</i> ) | NH <sub>3</sub><br>( <i>meta</i> ) |
| NO <sub>2</sub>                  | 3.054                              | 3.064                              | 3.393                  | 3.445                  | 3.059                              |
| CN                               | 3.068                              | 3.077                              | 3.404                  | 3.455                  | 3.069                              |
| CF <sub>3</sub>                  | 3.088                              | 3.093                              | 3.417                  | 3.470                  | 3.088                              |
| COCH <sub>3</sub>                | 3.112                              | 3.110                              | 3.429                  | 3.485                  | 3.117                              |
| CO <sub>2</sub> H                | 3.106                              | 3.106                              | 3.426                  | 3.482                  | 3.110                              |
| CHO                              | 3.093                              | 3.094                              | 3.418                  | 3.476                  | 3.097                              |
| Cl                               | 3.114                              | 3.115                              | 3.436                  | 3.493                  | 3.106                              |
| Br                               | 3.111                              | 3.113                              | 3.434                  | 3.49                   | 3.101                              |
| SH                               | 3.140                              | 3.138                              | 3.454                  | 3.518                  | 3.148                              |
| F                                | 3.121                              | 3.121                              | 3.441                  | 3.500                  | 3.108                              |
| H                                | 3.158                              | 3.150                              | 3.464                  | 3.533                  | 3.150                              |
| SCH <sub>3</sub>                 | 3.157                              | 3.150                              | 3.467                  | 3.524                  | 3.130                              |
| CH <sub>3</sub>                  | 3.168                              | 3.160                              | 3.472                  | 3.543                  | 3.160                              |
| OCH <sub>3</sub>                 | 3.170                              | 3.162                              | 3.477                  | 3.546                  | 3.157                              |
| OH                               | 3.158                              | 3.153                              | 3.467                  | 3.535                  | 3.141                              |
| NH <sub>2</sub>                  | 3.189                              | 3.175                              | 3.487                  | 3.560                  | 3.169                              |
| N(CH <sub>3</sub> ) <sub>2</sub> | 3.210                              | 3.186                              | 3.497                  | 3.571                  | 3.184                              |

**Table S2.** Interaction energies (all values in kJ mol<sup>-1</sup>) of the complexes between the *p*- and *m*-substituted halobenzenes and NH<sub>3</sub>, NCH and CNH.

| Subs.             | Position | Hal = I         |         | Hal = Br        |         |       |         |       |         |
|-------------------|----------|-----------------|---------|-----------------|---------|-------|---------|-------|---------|
|                   |          | NH <sub>3</sub> |         | NH <sub>3</sub> |         | NCH   |         | CNH   |         |
|                   |          | Ei              | Ei (cp) | Ei              | Ei (cp) | Ei    | Ei (cp) | Ei    | Ei (cp) |
| NO <sub>2</sub>   | <i>p</i> | -22.58          | -19.30  | -16.09          | -13.03  | -7.30 | -6.46   | -7.39 | -6.91   |
| CN                | <i>p</i> | -21.62          | -18.37  | -15.20          | -12.20  | -6.81 | -5.92   | -6.84 | -6.34   |
| CF <sub>3</sub>   | <i>p</i> | -20.34          | -17.15  | -14.07          | -11.13  | -6.01 | -5.12   | -6.01 | -5.50   |
| COCH <sub>3</sub> | <i>p</i> | -18.96          | -15.86  | -13.16          | -10.30  | -5.37 | -4.57   | -5.33 | -4.92   |
| CO <sub>2</sub> H | <i>p</i> | -19.28          | -16.17  | -13.31          | -10.43  | -5.39 | -4.57   | -5.36 | -4.93   |
| CHO               | <i>p</i> | -19.73          | -16.62  | -14.10          | -11.22  | -6.18 | -5.32   | -6.16 | -5.71   |
| Cl                | <i>p</i> | -18.60          | -15.48  | -12.48          | -9.64   | -4.93 | -4.02   | -4.89 | -4.38   |
| Br                | <i>p</i> | -18.76          | -15.63  | -12.63          | -9.78   | -5.02 | -4.11   | -4.98 | -4.47   |
| SH                | <i>p</i> | -17.11          | -14.04  | -11.17          | -8.42   | -4.03 | -3.15   | -3.96 | -3.47   |
| F                 | <i>p</i> | -18.20          | -15.07  | -12.09          | -9.24   | -4.67 | -3.76   | -4.64 | -4.11   |
| H                 | <i>p</i> | -16.27          | -13.30  | -10.56          | -7.88   | -3.63 | -2.75   | -3.54 | -3.05   |

|                                  |          |        |        |        |        |       |       |       |       |
|----------------------------------|----------|--------|--------|--------|--------|-------|-------|-------|-------|
| SCH <sub>3</sub>                 | <i>p</i> | -15.94 | -13.00 | -10.33 | -7.67  | -3.45 | -2.64 | -3.31 | -2.88 |
| CH <sub>3</sub>                  | <i>p</i> | -15.66 | -12.70 | -9.95  | -7.31  | -3.19 | -2.35 | -3.08 | -2.64 |
| OCH <sub>3</sub>                 | <i>p</i> | -15.03 | -12.09 | -9.69  | -7.06  | -3.09 | -2.32 | -2.98 | -2.60 |
| OH                               | <i>p</i> | -16.14 | -13.10 | -10.26 | -7.55  | -3.42 | -2.53 | -3.33 | -2.84 |
| NH <sub>2</sub>                  | <i>p</i> | -14.57 | -11.60 | -8.85  | -6.24  | -2.45 | -1.60 | -2.34 | -1.87 |
| N(CH <sub>3</sub> ) <sub>2</sub> | <i>p</i> | -13.81 | -10.92 | -8.18  | -5.61  | -1.96 | -1.11 | -1.81 | -1.38 |
| NO <sub>2</sub>                  | <i>m</i> |        |        | -15.71 | -12.64 |       |       |       |       |
| CN                               | <i>m</i> |        |        | -15.21 | -12.24 |       |       |       |       |
| CF <sub>3</sub>                  | <i>m</i> |        |        | -13.92 | -10.94 |       |       |       |       |
| COCH <sub>3</sub>                | <i>m</i> |        |        | -12.52 | -9.68  |       |       |       |       |
| CO <sub>2</sub> H                | <i>m</i> |        |        | -12.74 | -9.86  |       |       |       |       |
| CHO                              | <i>m</i> |        |        | -13.48 | -10.65 |       |       |       |       |
| Cl                               | <i>m</i> |        |        | -12.83 | -10.01 |       |       |       |       |
| Br                               | <i>m</i> |        |        | -12.80 | -9.96  |       |       |       |       |
| SH                               | <i>m</i> |        |        | -11.59 | -8.87  |       |       |       |       |
| F                                | <i>m</i> |        |        | -12.64 | -9.87  |       |       |       |       |
| H                                | <i>m</i> |        |        | -10.56 | -7.88  |       |       |       |       |
| SCH <sub>3</sub>                 | <i>m</i> |        |        | -10.68 | -8.00  |       |       |       |       |
| CH <sub>3</sub>                  | <i>m</i> |        |        | -9.81  | -7.28  |       |       |       |       |
| OCH <sub>3</sub>                 | <i>m</i> |        |        | -10.23 | -7.58  |       |       |       |       |
| OH                               | <i>m</i> |        |        | -10.95 | -8.33  |       |       |       |       |
| NH <sub>2</sub>                  | <i>m</i> |        |        | -9.22  | -6.74  |       |       |       |       |
| N(CH <sub>3</sub> ) <sub>2</sub> | <i>m</i> |        |        | -8.51  | -5.95  |       |       |       |       |

**Table S3.** Calculated properties of the isolated bromobenzenes

| X<br>hole         | C–Br  | <i>para</i> |               | C–Br  | <i>meta</i> |          |
|-------------------|-------|-------------|---------------|-------|-------------|----------|
|                   |       | Br radius   | $\sigma$ hole |       | Br radius   | $\sigma$ |
| NO <sub>2</sub>   | 1.916 | 2.021       | 0.0347        | 1.920 | 2.020       | 0.0319   |
| CN                | 1.919 | 2.023       | 0.0323        | 1.921 | 2.022       | 0.0308   |
| CF <sub>3</sub>   | 1.921 | 2.025       | 0.0285        | 1.923 | 2.025       | 0.0273   |
| COCH <sub>3</sub> | 1.921 | 2.028       | 0.0256        | 1.928 | 2.030       | 0.0246   |
| CO <sub>2</sub> H | 1.921 | 2.028       | 0.0257        | 1.926 | 2.029       | 0.0236   |
| CHO               | 1.920 | 2.026       | 0.0288        | 1.926 | 2.027       | 0.0271   |
| Cl                | 1.924 | 2.028       | 0.0234        | 1.924 | 2.028       | 0.0237   |
| Br                | 1.924 | 2.028       | 0.0238        | 1.925 | 2.027       | 0.0239   |
| SH                | 1.926 | 2.031       | 0.0192        | 1.928 | 2.032       | 0.0206   |
| F                 | 1.925 | 2.029       | 0.0224        | 1.924 | 2.028       | 0.0233   |
| H                 | 1.929 | 2.034       | 0.0174        | 1.929 | 2.034       | 0.0174   |
| SCH <sub>3</sub>  | 1.927 | 2.033       | 0.0167        | 1.930 | 2.035       | 0.0181   |

|                                  |       |       |        |       |       |        |
|----------------------------------|-------|-------|--------|-------|-------|--------|
| CH <sub>3</sub>                  | 1.930 | 2.035 | 0.0154 | 1.930 | 2.037 | 0.0155 |
| OCH <sub>3</sub>                 | 1.928 | 2.035 | 0.0146 | 1.931 | 2.036 | 0.0166 |
| OH                               | 1.928 | 2.033 | 0.0164 | 1.928 | 2.033 | 0.0192 |
| NH <sub>2</sub>                  | 1.930 | 2.037 | 0.0116 | 1.931 | 2.037 | 0.0135 |
| N(CH <sub>3</sub> ) <sub>2</sub> | 1.930 | 2.039 | 0.0092 | 1.935 | 2.041 | 0.0106 |

**Table S4.** Br...N distance (Å) and interaction energies in the complexes between the 4-substituted 1-bromobicyclo[2.2.2]octanes and NH<sub>3</sub>. In addition, the C-Br bond distance (Å), Br vdW radius (Å) and the MEP values (au) in the vdW surface along the C-Br bond of the isolated bromo derivatives are included.

| X                                | E <sub>i</sub> | E <sub>i</sub> (cp) | Br...N | C-Br  | Br radius | MEP-surface |
|----------------------------------|----------------|---------------------|--------|-------|-----------|-------------|
| NO <sub>2</sub>                  | -7.97          | -5.42               | 3.197  | 2.021 | 2.063     | -0.0022     |
| CN                               | -7.49          | -4.96               | 3.202  | 2.024 | 2.065     | 0.0050      |
| CF <sub>3</sub>                  | -6.85          | -4.39               | 3.214  | 2.025 | 2.067     | 0.0100      |
| COCH <sub>3</sub>                | -5.70          | -3.30               | 3.228  | 2.028 | 2.071     | 0.0067      |
| CO <sub>2</sub> H                | -5.71          | -3.31               | 3.228  | 2.029 | 2.071     | 0.0063      |
| CHO                              | -6.32          | -3.92               | 3.222  | 2.027 | 2.070     | 0.0029      |
| Cl                               | -6.64          | -4.17               | 3.213  | 2.025 | 2.068     | 0.0026      |
| Br                               | -6.91          | -4.46               | 3.211  | 2.025 | 2.067     | 0.0109      |
| SH                               | -5.83          | -3.43               | 3.226  | 2.029 | 2.071     | -0.0014     |
| F                                | -6.65          | -4.22               | 3.220  | 2.025 | 2.067     | 0.0033      |
| H                                | -4.19          | -1.92               | 3.250  | 2.034 | 2.077     | 0.0056      |
| SCH <sub>3</sub>                 | -5.47          | -3.09               | 3.233  | 2.030 | 2.073     | -0.0004     |
| CH <sub>3</sub>                  | -4.44          | -2.12               | 3.248  | 2.033 | 2.076     | 0.0067      |
| OCH <sub>3</sub>                 | -5.19          | -2.85               | 3.237  | 2.030 | 2.073     | 0.0008      |
| OH                               | -5.48          | -3.09               | 3.231  | 2.029 | 2.071     | 0.0020      |
| NH <sub>2</sub>                  | -4.82          | -2.48               | 3.240  | 2.031 | 2.074     | -0.0026     |
| N(CH <sub>3</sub> ) <sub>2</sub> | -4.55          | -2.28               | 3.248  | 2.031 | 2.075     | 0.0016      |

**Table S5.** Corrected interaction energy (kJ mol<sup>-1</sup>) and Br...N distance (Å) in the complexes between the 3- and 4-substituted pyridines and BrCl and BrF

|                 | E <sub>i</sub> (cp) |        |                    |        | Br...N distance    |       |                    |       |
|-----------------|---------------------|--------|--------------------|--------|--------------------|-------|--------------------|-------|
|                 | 3-subst. pyridines  |        | 4-subst. pyridines |        | 3-subst. pyridines |       | 4-subst. pyridines |       |
|                 | FBr                 | ClBr   | FBr                | ClBr   | FBr                | ClBr  | FBr                | ClBr  |
| NO <sub>2</sub> | -73.75              | -47.1  | -76.63             | -49.17 | 2.304              | 2.437 | 2.284              | 2.420 |
| CN              | -75.55              | -48.36 | -78.86             | -51.13 | 2.285              | 2.402 | 2.281              | 2.412 |
| CF <sub>3</sub> | -79.94              | -52.4  | -81.24             | -53.33 | 2.29               | 2.413 | 2.282              | 2.407 |

|                                  |         |        |         |        |       |       |       |       |
|----------------------------------|---------|--------|---------|--------|-------|-------|-------|-------|
| COCH <sub>3</sub>                | -84.98  | -56.48 | -86.59  | -57.6  | 2.289 | 2.405 | 2.27  | 2.385 |
| CO <sub>2</sub> H                | -84.45  | -56.14 | -85.58  | -56.58 | 2.285 | 2.402 | 2.271 | 2.391 |
| CHO                              | -81.18  | -53.34 | -83.41  | -54.72 | 2.286 | 2.405 | 2.273 | 2.397 |
| Cl                               | -82.94  | -54.95 | -85.51  | -57.17 | 2.302 | 2.434 | 2.279 | 2.394 |
| Br                               | -82.31  | -54.76 | -85.23  | -56.9  | 2.287 | 2.404 | 2.279 | 2.394 |
| SH                               | -88.45  | -59.68 | -91.34  | -62.26 | 2.276 | 2.391 | 2.268 | 2.372 |
| F                                | -83.44  | -55.52 | -85.75  | -57.53 | 2.268 | 2.37  | 2.282 | 2.396 |
| H                                | -91.78  | -62.82 | -91.78  | -62.82 | 2.269 | 2.375 | 2.269 | 2.375 |
| SCH <sub>3</sub>                 | -93.66  | -64.4  | -94.91  | -65.29 | 2.266 | 2.375 | 2.264 | 2.363 |
| CH <sub>3</sub>                  | -94.96  | -65.67 | -94.92  | -65.57 | 2.293 | 2.412 | 2.263 | 2.363 |
| OCH <sub>3</sub>                 | -95.05  | -65.75 | -96.41  | -66.77 | 2.267 | 2.371 | 2.266 | 2.359 |
| OH                               | -90.78  | -61.95 | -93.31  | -64.19 | 2.276 | 2.379 | 2.269 | 2.369 |
| NH <sub>2</sub>                  | -97.25  | -67.62 | -101.01 | -71.11 | 2.265 | 2.364 | 2.254 | 2.343 |
| N(CH <sub>3</sub> ) <sub>2</sub> | -102.45 | -72.63 | -105.47 | -75.1  | 2.255 | 2.345 | 2.245 | 2.329 |

**Table S6.** MEP minima (au) associated to the lone pair of the pyridine

| X                                | 4-X substituted | 3-X substituted |
|----------------------------------|-----------------|-----------------|
| NO <sub>2</sub>                  | -0.0728         | -0.0721         |
| CN                               | -0.0755         | -0.0736         |
| CF <sub>3</sub>                  | -0.0801         | -0.0796         |
| COCH <sub>3</sub>                | -0.0863         | -0.0879         |
| CO <sub>2</sub> H                | -0.0857         | -0.0854         |
| CHO                              | -0.0816         | -0.0826         |
| Cl                               | -0.0872         | -0.0839         |
| Br                               | -0.0865         | -0.0828         |
| SH                               | -0.0942         | -0.0888         |
| F                                | -0.0884         | -0.0860         |
| H                                | -0.0958         | -0.0958         |
| SCH <sub>3</sub>                 | -0.0986         | -0.0937         |
| CH <sub>3</sub>                  | -0.0994         | -0.0984         |
| OCH <sub>3</sub>                 | -0.1014         | -0.0967         |
| OH                               | -0.0981         | -0.0926         |
| NH <sub>2</sub>                  | -0.1069         | -0.1013         |
| N(CH <sub>3</sub> ) <sub>2</sub> | -0.1115         | -0.1054         |

**Table S7.**  $E_i(\text{cp})$ energies ( $\text{kJ mol}^{-1}$ ) of the complexes between the 4-substituted-1-bromobenzenes and 4-substituted pyridines calculated at the B97D/6-311+G(d) computational level. The substituents in the 1-bromobenzene derivatives are indicated in the columns and the substituents of the pyridines are indicated in each row.

|                   | NO <sub>2</sub> | CN     | CF <sub>3</sub> | COCH <sub>3</sub> | CO <sub>2</sub> H | CHO    | Cl     | Br     | SH     | F      | H     | SCH <sub>3</sub> | CH <sub>3</sub> | OCH <sub>3</sub> | OH    | NH <sub>2</sub> | NMe <sub>2</sub> |
|-------------------|-----------------|--------|-----------------|-------------------|-------------------|--------|--------|--------|--------|--------|-------|------------------|-----------------|------------------|-------|-----------------|------------------|
| NO <sub>2</sub>   | -11.05          | -10.63 | -10.02          | -9.72             | -9.84             | -10.15 | -9.47  | -9.54  | -8.90  | -9.29  | -8.63 | -8.58            | -8.37           | -8.29            | -8.51 | -7.92           | -7.65            |
| CN                | -11.40          | -10.94 | -10.41          | -9.93             | -10.05            | -10.41 | -9.64  | -9.72  | -9.01  | -9.45  | -8.71 | -8.66            | -8.43           | -8.34            | -8.58 | -7.93           | -7.70            |
| CF <sub>3</sub>   | -11.99          | -11.46 | -10.79          | -10.24            | -10.36            | -10.79 | -9.88  | -9.97  | -9.12  | -9.87  | -8.67 | -8.71            | -8.40           | -8.31            | -8.59 | -7.86           | -7.47            |
| COCH <sub>3</sub> | -12.82          | -12.18 | -11.37          | -10.66            | -10.72            | -11.40 | -10.23 | -10.34 | -9.32  | -9.95  | -8.88 | -8.89            | -8.46           | -8.32            | -8.68 | -7.68           | -7.24            |
| CO <sub>2</sub> H | -12.78          | -12.15 | -11.22          | -10.59            | -10.86            | -11.28 | -10.22 | -10.32 | -9.30  | -9.94  | -8.87 | -8.74            | -8.45           | -8.27            | -8.67 | -7.72           | -7.26            |
| CHO               | -12.16          | -11.60 | -10.86          | -10.32            | -10.41            | -10.87 | -9.93  | -10.03 | -9.14  | -9.69  | -8.76 | -8.70            | -8.40           | -8.16            | -8.57 | -7.76           | -7.39            |
| Cl                | -12.87          | -12.22 | -11.39          | -10.71            | -10.82            | -11.41 | -10.24 | -10.35 | -9.31  | -9.95  | -8.87 | -8.77            | -8.44           | -8.28            | -8.66 | -7.67           | -7.33            |
| Br                | -12.80          | -12.16 | -11.36          | -10.67            | -10.78            | -11.38 | -10.21 | -10.32 | -9.29  | -9.93  | -8.97 | -8.77            | -8.43           | -8.28            | -8.65 | -7.68           | -7.21            |
| SH                | -13.92          | -13.15 | -12.12          | -11.31            | -11.43            | -12.19 | -10.74 | -10.87 | -9.49  | -10.39 | -9.08 | -8.97            | -8.57           | -8.38            | -8.82 | -7.65           | -7.08            |
| F                 | -13.01          | -12.34 | -11.49          | -10.80            | -10.92            | -11.53 | -10.32 | -10.44 | -9.36  | -10.03 | -8.92 | -8.82            | -8.48           | -8.32            | -8.70 | -7.69           | -7.32            |
| H                 | -14.11          | -13.31 | -12.17          | -11.42            | -11.54            | -12.32 | -10.82 | -10.96 | -9.66  | -10.46 | -9.11 | -8.99            | -8.57           | -8.37            | -8.84 | -7.60           | -7.02            |
| SCH <sub>3</sub>  | -14.65          | -13.80 | -12.54          | -11.60            | -11.96            | -12.75 | -11.13 | -11.27 | -9.90  | -10.74 | -9.30 | -9.13            | -8.73           | -8.54            | -9.03 | -7.77           | -7.31            |
| CH <sub>3</sub>   | -14.70          | -13.84 | -12.71          | -11.79            | -11.90            | -12.77 | -11.12 | -11.27 | -9.86  | -10.73 | -9.26 | -9.16            | -8.56           | -8.48            | -8.97 | -7.63           | -7.01            |
| OCH <sub>3</sub>  | -15.00          | -14.11 | -12.85          | -11.92            | -12.17            | -12.98 | -11.28 | -11.43 | -9.97  | -10.87 | -9.35 | -9.44            | -8.75           | -8.64            | -9.05 | -7.96           | -7.30            |
| OH                | -14.44          | -13.61 | -12.50          | -11.63            | -11.75            | -12.54 | -11.00 | -11.14 | -9.70  | -10.63 | -9.21 | -9.11            | -8.66           | -8.83            | -8.91 | -7.69           | -7.28            |
| NH <sub>2</sub>   | -15.93          | -14.81 | -13.61          | -12.58            | -12.66            | -13.73 | -11.64 | -11.79 | -10.30 | -11.18 | -9.60 | -9.47            | -8.79           | -8.70            | -9.27 | -7.72           | -6.98            |
| NMe <sub>2</sub>  | -16.79          | -15.69 | -14.23          | -13.01            | -13.24            | -14.38 | -12.20 | -12.39 | -10.62 | -11.70 | -9.86 | -9.79            | -9.11           | -8.82            | -9.46 | -8.06           | -7.18            |

## List of equations.

$$\sigma_I = (0.996 \pm 0.038) \sigma_F, n = 16, R^2 = 0.978$$

$$\text{Dist}(\text{N} \cdots \text{Br}, 4\text{X-1Br-Benzene:NH}_3) = -0.92 \pm 0.04 + 1.17 \pm 0.01 * \text{Dist}(\text{N} \cdots \text{Br}, 4\text{X-1Br-Benzene:NCH}), R_2 = 0.998, n = 17$$

$$\text{Dist}(\text{N} \cdots \text{Br}, 4\text{X-1Br-Benzene:NH}_3) = -0.18 \pm 0.07 + 0.94 \pm 0.02 * \text{Dist}(\text{C} \cdots \text{Br}, 4\text{X-1Br-Benzene:CNH}), R^2 = 0.993, n = 17$$

$$\text{Dist}(\text{N} \cdots \text{Br}, 4\text{X-1Br-Benzene:NCH}) = 0.63 \pm 0.06 + 0.80 \pm 0.02 * \text{Dist}(\text{C} \cdots \text{Br}, 4\text{X-1Br-Benzene:CNH}), R^2 = 0.992, n = 17$$

$$\text{Dist}(\text{N} \cdots \text{Br}, 4\text{X-1Br-Benzene:NH}_3) = 0.08 \pm 0.13 + 0.97 \pm 0.04 * \text{Dist}(\text{N} \cdots \text{Br}, 3\text{X-1Br-Benzene:NH}_3), R^2 = 0.97, n = 17$$

$$\text{Ei}(\text{cp})(4\text{X-1Br-Benzene:NH}_3) = 2.03 \pm 0.03 + 0.936 \pm 0.002 * \text{Ei}(4\text{X-1Br-Benzene:NH}_3), R_2 = 0.9999, n = 17$$

$$\text{Ei}(\text{cp})(4\text{X-1Br-Benzene:NCH}) = 0.83 \pm 0.03 + 0.994 \pm 0.006 * \text{Ei}(4\text{X-1Br-Benzene:NCH}), R_2 = 0.9992, n = 17$$

$$\text{Ei}(\text{cp})(4\text{X-1Br-Benzene:CNH}) = 0.42 \pm 0.03 + 0.991 \pm 0.006 * \text{Ei}(4\text{X-1Br-Benzene:CNH}), R_2 = 0.9993, n = 17$$

$$\text{Ei}(\text{cp})(3\text{X-1Br-Benzene:NH}_3) = 1.83 \pm 0.07 + 0.922 \pm 0.006 * \text{Ei}(3\text{X-1Br-Benzene:NH}_3), R_2 = 0.9993, n = 17$$

$$\text{Eq. [6], Ei}(\text{cp})(4\text{X-1Br-Benzene:NH}_3) = -197. \pm 3. + 60.1 \pm 0.9 * \text{Dist}(\text{N} \cdots \text{Br}, 4\text{X-1Br-Benzene:NH}_3), R_2 = 0.996, n = 17, \text{SD} = 0.13$$

$$\text{Eq. [7], Ei}(\text{cp})(4\text{X-1Br-Benzene:NH}_3) = -8.6 \pm 0.2 - 4.5 \pm 0.4 * \sigma_p(\text{X}), R_2 = 0.916, n = 17, \text{SD} = 0.63$$

$$\text{Eq. [8], Ei}(\text{cp})(4\text{X-1Br-Benzene:NH}_3) = -7.9 \pm 0.2 - 6.0 \pm 0.4 * \sigma_F(\text{X}) - 5.7 \pm 0.3 * \sigma_R(\text{X}), R_2 = 0.982, n = 16, \text{SD} = 0.29$$

$$\text{Eq. [9], Ei}(\text{cp})(4\text{X-1Br-Benzene:NH}_3) = -921. \pm 54. - 474 \pm 28 * \text{Dist}(\text{C-Br}, 4\text{X-1Br-Benzene}), R_2 = 0.950, n = 17, \text{SD} = 0.49.$$

$$\text{Eq. [10], Ei}(\text{cp})(4\text{X-1Br-Benzene:NH}_3) = -859 \pm 30. - 418 \pm 15 * \text{Dist}(\text{Br-radius}, 4\text{X-1Br-Benzene}), R_2 = 0.982, n = 17, \text{SD} = 0.29.$$

$$\text{Eq. [11], Ei}(\text{cp})(4\text{X-1Br-Benzene:NH}_3) = -2.82 \pm 0.05 - 292. \pm 2. * \sigma_{\text{hole}}(4\text{X-1Br-Benzene}), R_2 = 0.999, n = 17, \text{SD} = 0.06$$

$$\text{Eq. [12], Ei}(\text{cp})(3\text{X-1Br-Benzene:NH}_3) = -170. \pm 8. + 51. \pm 3. * \text{Dist}(\text{N} \cdots \text{Br}, 3\text{X-1Br-Benzene:NH}_3), R_2 = 0.965, n = 17, \text{SD} = 0.36$$

Eq. [13],  $E_i(\text{cp}) (3\text{X-1Br-Benzene:NH}_3) = -7.4 \pm 0.2 - 7.4 \pm 0.2 * \sigma_m (\text{X})$ ,  
 $R_2 = 0.942$ ,  $n = 17$ ,  $SD = 0.46$

Eq. [14],  $E_i(\text{cp}) (3\text{X-1Br-Benzene:NH}_3) = -7.7 \pm 0.2 - 6.4 \pm 0.4 * \sigma_F (\text{X}) - 4.2 \pm 0.3 * \sigma_R (\text{X})$ ,  
 $R_2 = 0.974$ ,  $n = 16$ ,  $SD = 0.31$

Eq. [15],  $E_i(\text{cp}) (3\text{X-1Br-Benzene:NH}_3) = -890 \pm 65. - 457 \pm 34 * \text{Dist}(\text{C-Br}, 3\text{X-1Br-Benzene})$ ,  
 $R_2 = 0.925$ ,  $n = 17$ ,  $SD = 0.53$ .

Eq. [16],  $E_i(\text{cp}) (3\text{X-1Br-Benzene:NH}_3) = -670. \pm 20. - 325. \pm 10. * \text{Dist}(\text{Br-radius}, 3\text{X-1Br-Benzene})$ ,  
 $R_2 = 0.986$ ,  $n = 17$ ,  $SD = 0.23$ .

Eq. [17],  $E_i(\text{cp}) (3\text{X-1Br-Benzene:NH}_3) = -2.5 \pm 0.2 - 312 \pm 7 * \sigma \text{ hole}(3\text{X-1Br-Benzene})$ ,  
 $R_2 = 0.991$ ,  $n = 17$ ,  $SD = 0.18$

Eq. [18],  $E_i(\text{cp}) (3/4\text{X-1Br-Benzene:NH}_3) = -183. \pm 5. + 56. \pm 2. * \text{Dist}(\text{N} \cdots \text{Br}, 3/4\text{X-1Br-Benzene:NH}_3)$ ,  $R_2 = 0.976$ ,  $n = 34$ ,  $SD = 0.31$

Eq. [19],  $E_i(\text{cp}) (3/4\text{X-1Br-Benzene:NH}_3) = -8.3 \pm 0.1 - 5.0 \pm 0.4 * \sigma_m / \sigma_p (\text{X})$ ,  
 $R_2 = 0.852$ ,  $n = 34$ ,  $SD = 0.77$

Eq. [20],  $E_i(\text{cp}) (3/4\text{X-1Br-Benzene:NH}_3) = -7.8 \pm 0.1 - 6.2 \pm 0.3 * \sigma_F (\text{X}) - 5.0 \pm 0.3 * \sigma_R (\text{X})$ ,  
 $R_2 = 0.975$ ,  $n = 32$ ,  $SD = 0.35$

Eq. [21],  $E_i(\text{cp}) (3/4\text{X-1Br-Benzene:NH}_3) = -829 \pm 61. - 426 \pm 32 * \text{Dist}(\text{C-Br}, 3/4\text{X-1Br-Benzene})$ ,  
 $R_2 = 0.850$ ,  $n = 34$ ,  $SD = 0.77$ .

Eq. [22],  $E_i(\text{cp}) (3/4\text{X-1Br-Benzene:NH}_3) = -750 \pm 26. - 365 \pm 13. * \text{Dist}(\text{Br-radius}, 3/4\text{X-1Br-Benzene})$ ,  $R_2 = 0.963$ ,  $n = 34$ ,  $SD = 0.38$ .

Eq. [23],  $E_i(\text{cp}) (3\text{X-1Br-Benzene:NH}_3) = -2.68 \pm 0.09 - 300 \pm 4 * \sigma \text{ hole}(3/4\text{X-1Br-Benzene})$ ,  
 $R_2 = 0.994$ ,  $n = 34$ ,  $SD = 0.15$

Eq. [24],  $E_i(\text{cp}) (3/4\text{X-1Br-Benzene:NH}_3/\text{NCH}/\text{CNH}) = 21 \pm 5 - 290 \pm 208 * \sigma \text{ hole}(3/4\text{X-1Br-Benzene}) - 0.028 \pm 0.006 * \text{PA}(\text{NH}_3/\text{NCH}/\text{CNH}) - 0.7 \pm 0.3 * \sigma \text{ hole} * \text{PA}$ ,  $R_2 = 0.927$ ,  $n = 68$ ,  $SD = 0.86$

Eq. [25],  $E_i(\text{cp}) (3/4\text{X-1Br-Benzene:NH}_3/\text{NCH}/\text{CNH}) = 4.7 \pm 0.2 - 117 \pm 7 * \sigma \text{ hole}(3/4\text{X-1Br-Benzene}) - 60 \pm 2 * \text{MEP minimum}(\text{NH}_3/\text{NCH}/\text{CNH}) + 1470 \pm 70 * \sigma \text{ hole} * \text{MEP}$ ,  $R_2 = 0.998$ ,  $n = 68$ ,  $SD = 0.11$

Eq. [26],  $E_i(\text{cp}) (1\text{-Bromo-4-X-bicyclo}[2.2.2]\text{octanes:NH}_3) = 1.99 \pm 0.03. - 0.930 \pm 0.004 * E_i(1\text{-Bromo-4-X-bicyclo}[2.2.2]\text{octanes:NH}_3)$ ,  $R_2 = 0.9997$ ,  $n = 17$ ,  $SD = 0.02$ .

Eq. [27],  $E_i(\text{cp}) (1\text{-Bromo-4-X-bicyclo}[2.2.2]\text{octanes:NH}_3) = -2.1 \pm 0.1. - 4.6 \pm 0.4 * \sigma_F (\text{X})$ ,  
 $R_2 = 0.897$ ,  $n = 17$ ,  $SD = 0.34$ .

Eq. [28],  $E_i(\text{cp}) (1\text{-Bromo-4-X-bicyclo}[2.2.2]\text{octanes:NH}_3) = -210 \pm 7 + 64 \pm 2 * \text{Dist}(\text{N} \cdots \text{Br}, 1\text{-Bromo-4-X-bicyclo}[2.2.2]\text{octanes:NH}_3)$ ,  $R_2 = 0.984$ ,  $n = 17$ ,  $SD = 0.13$

Eq. [29],  $E_i(\text{cp}) (1\text{-Bromo-4-X-bicyclo}[2.2.2]\text{octanes:NH}_3) = -588 \pm 27. + 288 \pm 13 * \text{Dist}(\text{C-Br}, 1\text{-Bromo-4-X-bicyclo}[2.2.2]\text{octanes})$ ,  $R_2 = 0.969$ ,  $n = 17$ ,  $SD = 0.19$ .



Eq. [30],  $E_i(\text{cp})$  (1-Bromo-4-X-bicyclo[2.2.2]octanes: $\text{NH}_3$ ) =  $-527 \pm 18 + 253 \pm 9 * \text{Dist}(\text{Br-radius, 1-Bromo-4-X-bicyclo[2.2.2]octanes})$ ,  $R^2 = 0.983$ ,  $n=17$ ,  $\text{SD}=0.14$ .

Eq. [31],  $E_i(\text{cp})$  (1-Bromo-4-X-bicyclo[2.2.2]octanes: $\text{NH}_3$ ) =  $-2.63 \pm 0.03 - 254 \pm 5 * \text{MEP}(1\text{-Bromo-4-X-bicyclo[2.2.2]octanes})$ ,  $R^2 = 0.993$ ,  $n=17$ ,  $\text{SD}=0.09$ .

$E_i(\text{cp})$  (4X-1Br-Benzene: $\text{NH}_3$ ) =  $(-7. \pm 1.) + 2.1 \pm 0.3 * E_i(\text{cp})$  (1-Bromo-4-X-bicyclo[2.2.2]octanes:  $\text{NH}_3$ ),  $R^2 = 0.74$ ,  $n=17$ .

Eq. [32],  $E_i(\text{cp})$  (4X-1Br-Benzene: $\text{NH}_3$ ) =  $-(7.9 \pm 0.2) - (4.1 \pm 1.5)\sigma_F - (5.6 \pm 0.3)\sigma_{R-} - (1.7 \pm 1.4)\sigma_I$ ,  $R^2 = 0.986$ ,  $n=17$

Eq. [33],  $E_i(\text{cp})$  (1-Bromo-4-X-bicyclo[2.2.2]octanes: $\text{NH}_3$ ) =  $-(2.2 \pm 0.1) - (2.9 \pm 1.0)\sigma_F - (0.9 \pm 0.2)\sigma_{R-} - (1.7 \pm 0.9)\sigma_I$ ,  $R^2 = 0.973$ ,  $n=17$ .

Eq. [34],  $E_i(\text{cp})$  (4X-1Br-Benzene: $\text{NH}_3$ )-coded =  $(0.38 \pm 0.04) - (1.1 \pm 0.4)\sigma_F - (1.51 \pm 0.08)\sigma_{R-} - (0.5 \pm 0.4)\sigma_I$ ,  $R^2 = 0.986$

Eq. [35],  $E_i(\text{cp})$  (1-Bromo-4-X-bicyclo[2.2.2]octanes: $\text{NH}_3$ )-coded =  $(0.84 \pm 0.06) - (1.6 \pm 0.6)\sigma_F - (0.5 \pm 0.1)\sigma_{R-} - (1.0 \pm 0.5)\sigma_I$ ,  $R^2 = 0.973$

Eq. [36],  $E_i(\text{cp})$  (FBr:3X-pyridines) =  $-94.8 \pm 0.8 + 31 \pm 2 * \sigma_m(\text{X})$ ,  
 $R^2 = 0.921$ ,  $n=17$ ,  $\text{SD}=2.30$

Eq. [37],  $E_i(\text{cp})$  (FBr:4X-pyridines) =  $-90.9 \pm 0.6 + 16 \pm 1 * \sigma_p(\text{X})$ ,  
 $R^2 = 0.907$ ,  $n=17$ ,  $\text{SD}=2.45$

Eq. [38],  $E_i(\text{cp})$  (FBr:3/4X-pyridines) =  $-91.6 \pm 0.6 + 19 \pm 2 * \sigma_m/\sigma_p(\text{X})$ ,  
 $R^2 = 0.834$ ,  $n=34$ ,  $\text{SD}=3.24$

Eq. [39],  $E_i(\text{cp})$  (ClBr:3X-pyridines) =  $-65.6 \pm 0.7 + 28. \pm 2 * \sigma_m(\text{X})$ ,  
 $R^2 = 0.921$ ,  $n=17$ ,  $\text{SD}=2.05$

Eq. [40],  $E_i(\text{cp})$  (ClBr:4X-pyridines) =  $-61.9 \pm 0.5 + 15.0 \pm 1 * \sigma_p(\text{X})$ ,  
 $R^2 = 0.920$ ,  $n=17$ ,  $\text{SD}=2.06$

Eq. [41],  $E_i(\text{cp})$  (ClBr:3/4X-pyridines) =  $-62.6 \pm 0.5 + 18. \pm 1 * \sigma_m/\sigma_p(\text{X})$ ,  
 $R^2 = 0.834$ ,  $n=34$ ,  $\text{SD}=2.81$

Eq. [42],  $E_i(\text{cp})$  (FBr/ClBr:3/4X-pyridines) =  $34 \pm 5 + 570 \pm 54 * \text{MEP} \text{ m\acute{e}nima}(3/4\text{X-pyridines}) - 628 \pm 70 * \sigma \text{ hole}(\text{FBr/ClBr}) + 2402 \pm 776 * \text{MEP} * \sigma \text{ hole}$ ,  $R^2 = 0.996$ ,  $n=68$ ,  $\text{SD}=1.07$

Eq. [43],  $E_i(\text{cp})$  (4X-1Br-benzenes:4X-pyridines) =  $-9.88 \pm 0.04 - 4.00 \pm 0.08 * \sigma_p(4\text{X-1Br-benzenes}) + 1.13 \pm 0.08 * \sigma_p(4\text{X-pyridines}) + 2.21 \pm 0.18 * \sigma_p(4\text{X-1Br-benzenes}) * \sigma_p(4\text{X-pyridines})$ ,  
 $R^2 = 0.902$ ,  $n=289$ ,  $\text{SD}=0.60$

Eq. [44],  $E_i(\text{cp})$  (4X-1Br-benzenes:4X-pyridines) =  $-12.0 \pm 0.2 - 332 \pm 10 * \sigma \text{ hole}(4\text{X-1Br-benzenes}) - 78 \pm 2 * \text{MEP} \text{ minimum}(4\text{X-pyridines}) + 6351 \pm 105 * \sigma \text{ hole}(4\text{X-1Br-benzenes}) * \text{MEP}(4\text{X-pyridines})$ ,  $R^2 = 0.995$ ,  $n=289$ ,  $\text{SD}=0.13$
